# Supplementary material for: The microbiome in PTEN hamartoma tumor syndrome
Source: PubMed Central journal article supplement (PMC5799828; doi:10.1530/erc-17-0442), 2017-12-12

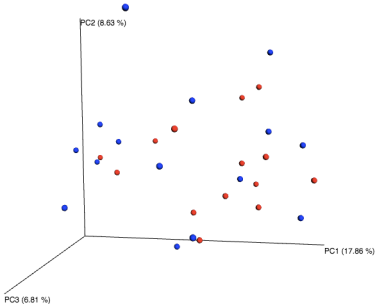

Supplement: erc-25-233-s001.pdf [file erc-25-233-s001.pdf]
