# Supplementary material for: The microbiome in PTEN hamartoma tumor syndrome
Source: PubMed Central journal article supplement (PMC5799828; doi:10.1530/erc-17-0442), 2017-12-12
Supplement: erc-25-233-s003.pdf [file erc-25-233-s003.pdf]

PHTS Microbiome Study Questionnaire

|                                                                                                                                                                                                                                                                                                                                                                                                                                                                                                                                                                                                                                                                                                                                                                                                                                                                                             |                                            |                                                                                                                                                                                                                                                                                                                                                                                                                                                                                                                                                                                                                                                                                                                                                                                                                                                                                                                                                      |
|---------------------------------------------------------------------------------------------------------------------------------------------------------------------------------------------------------------------------------------------------------------------------------------------------------------------------------------------------------------------------------------------------------------------------------------------------------------------------------------------------------------------------------------------------------------------------------------------------------------------------------------------------------------------------------------------------------------------------------------------------------------------------------------------------------------------------------------------------------------------------------------------|--------------------------------------------|------------------------------------------------------------------------------------------------------------------------------------------------------------------------------------------------------------------------------------------------------------------------------------------------------------------------------------------------------------------------------------------------------------------------------------------------------------------------------------------------------------------------------------------------------------------------------------------------------------------------------------------------------------------------------------------------------------------------------------------------------------------------------------------------------------------------------------------------------------------------------------------------------------------------------------------------------|
| <b>Age (years):</b> _____                                                                                                                                                                                                                                                                                                                                                                                                                                                                                                                                                                                                                                                                                                                                                                                                                                                                   | <b>BMI</b><br><b>Height (in):</b><br>_____ | <b>Race/ethnicity (check all that apply):</b><br><input type="checkbox"/> White non-Hispanic/Latino<br><input type="checkbox"/> White Hispanic/Latino<br><input type="checkbox"/> Black or African-American<br><input type="checkbox"/> Asian or Pacific Islander<br><input type="checkbox"/> Native American or Alaskan Native<br><input type="checkbox"/> Other (specify): _____                                                                                                                                                                                                                                                                                                                                                                                                                                                                                                                                                                   |
| <b>Sex (check one):</b><br><input type="checkbox"/> Male<br><input type="checkbox"/> Female<br><input type="checkbox"/> Other (specify):<br>_____                                                                                                                                                                                                                                                                                                                                                                                                                                                                                                                                                                                                                                                                                                                                           | <b>Weight (lbs):</b><br>_____              |                                                                                                                                                                                                                                                                                                                                                                                                                                                                                                                                                                                                                                                                                                                                                                                                                                                                                                                                                      |
| <b>Smoking status</b><br><input type="checkbox"/> Never smoker<br><input type="checkbox"/> Former smoker<br>○ _____ packs/day, _____ years<br><input type="checkbox"/> Current smoker<br>○ _____ packs/day, _____ years                                                                                                                                                                                                                                                                                                                                                                                                                                                                                                                                                                                                                                                                     |                                            | <b>Alcohol consumption</b><br><input type="checkbox"/> Never<br><input type="checkbox"/> Occasional<br>○ _____ drinks per <input type="checkbox"/> day <input type="checkbox"/> week <input type="checkbox"/> month<br><input type="checkbox"/> Social<br>○ _____ drinks per <input type="checkbox"/> day <input type="checkbox"/> week <input type="checkbox"/> month<br><input type="checkbox"/> Frequent<br>○ _____ drinks per <input type="checkbox"/> day <input type="checkbox"/> week <input type="checkbox"/> month                                                                                                                                                                                                                                                                                                                                                                                                                          |
| <b>Do you use probiotics regularly (3 or more times per week)?</b> <input type="checkbox"/> Yes <input type="checkbox"/> No                                                                                                                                                                                                                                                                                                                                                                                                                                                                                                                                                                                                                                                                                                                                                                 |                                            |                                                                                                                                                                                                                                                                                                                                                                                                                                                                                                                                                                                                                                                                                                                                                                                                                                                                                                                                                      |
| <b>Last oral antibiotic or antifungal use (&gt;1 day):</b><br><input type="checkbox"/> <1 month ago<br><input type="checkbox"/> 1-6 months ago<br><input type="checkbox"/> 6-12 months ago<br><input type="checkbox"/> >12 months ago                                                                                                                                                                                                                                                                                                                                                                                                                                                                                                                                                                                                                                                       |                                            | <b>Do you use laxatives regularly (3 or more times per week)?</b> <input type="checkbox"/> Yes <input type="checkbox"/> No<br><b>If Yes, last laxative use:</b><br><input type="checkbox"/> ≤ 7 days ago<br><input type="checkbox"/> >7 days ago                                                                                                                                                                                                                                                                                                                                                                                                                                                                                                                                                                                                                                                                                                     |
| <b>Diet (check one):</b><br><input type="checkbox"/> American/Western <input type="checkbox"/> Mediterranean<br><input type="checkbox"/> Vegetarian <input type="checkbox"/> Vegan<br><input type="checkbox"/> Gluten-free <input type="checkbox"/> Low-carb/Atkins<br><input type="checkbox"/> Paleo<br><input type="checkbox"/> Country-specific (Country: _____)<br><input type="checkbox"/> Other: _____                                                                                                                                                                                                                                                                                                                                                                                                                                                                                |                                            | <b>Oral hygiene</b><br>How many times per day do you brush your teeth?<br><input type="checkbox"/> Once or less <input type="checkbox"/> Twice <input type="checkbox"/> 3 or more times<br>When did you last eat before the oral rinse?<br><input type="checkbox"/> < 1 hour <input type="checkbox"/> 1-4 hours <input type="checkbox"/> More than 4 hours<br>When did you brush your teeth before the oral rinse?<br><input type="checkbox"/> < 1 hour <input type="checkbox"/> 1-4 hours <input type="checkbox"/> More than 4 hours                                                                                                                                                                                                                                                                                                                                                                                                                |
| <b>Past medical history (check all that apply):</b><br><input type="checkbox"/> Cancer (if yes, please specify): _____<br>_____ <ul style="list-style-type: none"> <li>○ Date of diagnosis (year): _____</li> </ul> <input type="checkbox"/> Recent hospitalization <ul style="list-style-type: none"> <li>○ If yes, how long: _____ <input type="checkbox"/>days <input type="checkbox"/>weeks</li> <li>○ When (month/year): _____</li> <li>○ Reason? _____</li> </ul> <input type="checkbox"/> ICU stay <ul style="list-style-type: none"> <li>○ If yes, how long: _____ <input type="checkbox"/>days <input type="checkbox"/>weeks</li> <li>○ When (month/year): _____</li> <li>○ Reason? _____</li> </ul> <input type="checkbox"/> Recent UTI (if yes, when? ___ <input type="checkbox"/> weeks <input type="checkbox"/> mos. ago)<br><input type="checkbox"/> History of kidney stones |                                            | <input type="checkbox"/> Neurological impairment or spinal cord injury with persistent symptoms<br>Please describe: _____<br><input type="checkbox"/> Bladder or GI surgery<br>Please specify: _____<br><input type="checkbox"/> Ulcerative colitis or Crohn's disease<br><input type="checkbox"/> Diverticulitis<br><input type="checkbox"/> C. difficile infection ("C. diff")<br>Have you had a fecal microbiota transplant?<br><input type="checkbox"/> Yes <input type="checkbox"/> No<br><b>Birth and developmental history</b><br>Were you born via <input type="checkbox"/> Vaginal delivery <input type="checkbox"/> C-section<br><input type="checkbox"/> Unknown<br>Were you breastfed as a baby? <input type="checkbox"/> Yes <input type="checkbox"/> No <input type="checkbox"/> Unknown<br><br>Have you been given a formal diagnosis of autism or autism spectrum disorder? <input type="checkbox"/> Yes <input type="checkbox"/> No |

PHTS Microbiome Study Questionnaire

Please record the following:

- Date \_\_\_\_\_ and time \_\_\_\_\_ **stool** was collected
  - How long after it was collected was it put in the REFRIGERATOR? \_\_\_\_\_  minutes  hours
- Date \_\_\_\_\_ and time \_\_\_\_\_ **urine** was collected
  - How long after it was collected was it put in the REFRIGERATOR? \_\_\_\_\_  minutes  hours
- Date \_\_\_\_\_ and time \_\_\_\_\_ **oral rinse** was collected
  - How long after it was collected was it put in the REFRIGERATOR? \_\_\_\_\_  minutes  hours

\*\* Please DO NOT place the stool, urine, or oral rinse samples in the FREEZER! \*\*

Thank you for your participation in this study!
