# Supplementary material for: The microbiome in PTEN hamartoma tumor syndrome
Source: PubMed Central journal article supplement (PMC5799828; doi:10.1530/erc-17-0442), 2017-12-12
Supplement: erc-25-233-t001.pdf [file erc-25-233-t001.pdf]

The Microbiome in *PTEN* Hamartoma Tumor Syndrome**Supplementary Table 1: Mutations of all subjects**

| Subject | Mutation                          |
|---------|-----------------------------------|
| PC1     | c.865_871del7 (p.Gly289Lysfs)     |
| PC2     | c.164+1G>T                        |
| PC3     | c.334insG (p.Leu112Argfs*3)       |
| PC4     | c.585dupT (p.His196Serfs*6)       |
| PC5     | c.697C>T (p.Arg233Ter)            |
| PC9     | c.686C>G p.(Ser229*)              |
| PC10    | c.1003C>T (p.Arg335Ter)           |
| PC11    | c.46T>C (p.Tyr16His)              |
| PC13    | c.1061C>A (p.Pro354Gln)           |
| PC14    | E2 del (c.80-?_c.164+?del)        |
| PC15    | c.1003C>T (p.Arg335Ter)           |
| PC16    | c.275A>C (p.Asp92Ala)             |
| PC17    | E6 dup(c.493-?_c.634+?dup)        |
| PC19    | c.210-1G>A                        |
| PC20    | c.112C>T (p.Pro38Ser)             |
| PC25    | c.195insT (p.Lys66*)              |
| PC30    | c.800dupA (p.Lys267fs)            |
| PN1     | c.437T>G (p.Leu146Ter)            |
| PN2     | c.219_222dupAAGA (p.His75Lysfs*4) |
| PN3     | E2del (c.80-_164+_del_)           |
| PN4     | c.955_958delACTT (p.Thr319Ter)    |
| PN5     | c.165-2A>G                        |
| PN6     | c.388C>T (p.Arg130Ter)            |
| PN7     | c.97_99delATT (p.Ile33del)        |
| PN8     | c.44ins16bp                       |
| PN12    | c.1-?_1212 +?del                  |
| PN18    | c.542T>C (p.Leu181Pro)            |
| PN21    | c.103A>G (p.Met35Val)             |
| PN22    | c.46dupT (p.Tyr16Leufs*28)        |
| PN23    | c.892 C>T (p.Gln298Ter)           |
| PN24    | c.511C>T (p.Gln171*)              |
| PN29    | c.517C>T (p.Arg173Cys)            |

Mutations are provided in standard mutation nomenclature.

PC: *PTEN* Cancer

PN: *PTEN* Non-cancer
